# Supplementary material for: Pre-Weaned Calf Rearing on Northern Irish Dairy Farms—Part 2: The Impact of Hygiene Practice on Bacterial Levels in Dairy Calf Rearing Environments
Source: MDPI journal article supplement (doi:10.3390/ani13061109), 2023-03-21
Supplement: s1 [file s1]

*Supplementary Table S1. Risk factors for liquid and solid feed offered to calves that were not associated with the likelihood of meeting hygiene indicator targets*

| Variable<br>(Hygiene Indicator) | % within<br>target | Total<br>number | Probability*<br>(LCI-UCI**) | p-value |
|---------------------------------|--------------------|-----------------|-----------------------------|---------|
| Milk/Milk replacer              |                    |                 |                             |         |
| Source (TVC)                    |                    |                 |                             |         |
| Bulk tank                       | 64.9               | 37              | 0.61 (0.37-0.81)            | 0.172   |
| AMF prepared                    | 40.7               | 27              | 0.37 (0.16-0.65)            |         |
| Manually prepared               | 34.5               | 110             | 0.34 (0.22-0.49)            |         |
| Type (TCC)                      |                    |                 |                             |         |
| Cow's milk                      | 23.7               | 38              | 0.23 (0.10-0.45)            | 0.147   |
| Milk replacer                   | 81.9               | 155             | 0.40 (0.30-0.52)            |         |
| Source ( <i>E. coli</i> )       |                    |                 |                             |         |
| Bulk tank                       | 63.2               | 38              | 0.64 (0.38-0.83)            | 0.300   |
| AMF prepared                    | 80.6               | 31              | 0.77 (0.50-0.92)            |         |
| Manually prepared               | 82.3               | 124             | 0.82 (0.71-0.90)            |         |
| Type ( <i>E. coli</i> )         |                    |                 |                             |         |
| Cow's milk                      | 63.2               | 38              | 0.64 (0.39-0.83)            | 0.129   |
| Milk replacer                   | 77.8               | 155             | 0.81 (0.71-0.89)            |         |
| Starter feed                    |                    |                 |                             |         |
| Pen source (TVC)                |                    |                 |                             |         |
| Single bucket                   | 13.3               | 75              | 0.12 (0.05-0.26)            | 0.804   |
| Group trough                    | 11                 | 118             | 0.11 (0.05-0.21)            |         |
| Pen source (TCC)                |                    |                 |                             |         |
| Single bucket                   | 62.4               | 85              | 0.62 (0.47-0.75)            | 0.127   |
| Group trough                    | 73.9               | 138             | 0.74 (0.63-0.83)            |         |
| Water                           |                    |                 |                             |         |
| Drinker source (TVC)            |                    |                 |                             |         |
| Mains supply                    | 10.7               | 103             | 0.11 (0.05-0.24)            | 0.411   |
| Bore well                       | 7.1                | 113             | 0.07 (0.03-0.16)            |         |
| Drinker location (TVC)          |                    |                 |                             |         |
| Inside pen                      | 8.1                | 149             | 0.08 (0.04-0.16)            | 0.982   |
| Outside pen                     | 7.7                | 65              | 0.08 (0.03-0.20)            |         |
| Pen type (TVC)                  |                    |                 |                             |         |
| Single calf pen                 | 12.9               | 62              | 0.14 (0.06-0.30)            | 0.107   |
| Group calf pen                  | 5.9                | 152             | 0.06 (0.03-0.12)            |         |
| Average Hygiene score (TVC)     |                    |                 |                             |         |
| ≤2                              | 7.1                | 140             | 0.10 (0.05-0.18)            | 0.313   |
| >2                              | 4.3                | 70              | 0.05 (0.01-0.15)            |         |
| Drinker Source (TCC)            |                    |                 |                             |         |
| Mains supply                    | 7.8                | 103             | 0.08 (0.03-0.18)            | 0.396   |
| Bore well                       | 4.4                | 113             | 0.04 (0.02-0.12)            |         |
| Drinker location (TCC)          |                    |                 |                             |         |
| Inside pen                      | 6.7                | 149             | 0.06 (0.03-0.13)            | 0.447   |
| Outside pen                     | 1.5                | 65              | 0.04 (0.01-0.14)            |         |
| Average Hygiene score (TCC)     |                    |                 |                             |         |
| ≤2                              | 1.4                | 140             | 0.04 (0.01-0.09)            | 0.306   |
| >2                              | 7.1                | 70              | 0.07 (0.03-0.17)            |         |
| Average Clean-ease score (TCC)  |                    |                 |                             |         |
| ≤2                              | 2.0                | 147             | 0.04 (0.02-0.09)            | 0.547   |
| >2                              | 6.3                | 63              | 0.06 (0.02-0.017)           |         |

|                                             |      |     |                  |       |
|---------------------------------------------|------|-----|------------------|-------|
| Drinker Source ( <i>E. coli</i> )           |      |     |                  |       |
| Mains supply                                | 13.6 | 103 | 0.14 (0.06-0.27) | 0.249 |
| Bore well                                   | 7.1  | 113 | 0.07 (0.03-0.16) |       |
| Drinker location ( <i>E. coli</i> )         |      |     |                  |       |
| Inside pen                                  | 11.4 | 149 | 0.10 (0.05-0.19) | 0.661 |
| Outside pen                                 | 4.6  | 65  | 0.08 (0.03-0.21) |       |
| Pen type ( <i>E. coli</i> )                 |      |     |                  |       |
| Single calf pen                             | 11.3 | 62  | 0.14 (0.06-0.30) | 0.274 |
| Group calf pen                              | 8.6  | 152 | 0.08 (0.04-0.16) |       |
| Drinker type ( <i>E. coli</i> )             |      |     |                  |       |
| Self-fill drinker                           | 7.3  | 110 | 0.07 (0.03-0.16) | 0.289 |
| Bucket                                      | 11.5 | 104 | 0.13 (0.06-0.25) |       |
| Average Hygiene score ( <i>E. coli</i> )    |      |     |                  |       |
| ≤2                                          | 4.3  | 140 | 0.06 (0.03-0.12) | 0.105 |
| >2                                          | 14.3 | 70  | 0.14 (0.07-0.27) |       |
| Average Clean-ease score ( <i>E. coli</i> ) |      |     |                  |       |
| ≤2                                          | 5.4  | 147 | 0.07 (0.03-0.14) | 0.336 |
| >2                                          | 12.7 | 63  | 0.12 (0.05-0.27) |       |

TVC = Total Viable Count TCC = Total Coliform Count

Supplementary Table S2. Risk factors for bedding that were not associated with the likelihood of meeting hygiene indicator targets

| Variable<br>(Hygiene Indicator)   | % within<br>target | Total<br>number | Probability*<br>(LCI-UCI**) | p-value |
|-----------------------------------|--------------------|-----------------|-----------------------------|---------|
| Disinfectant used (TVC)           |                    |                 |                             |         |
| Yes                               | 75.7               | 185             | 0.76 (0.66-0.84)            | 0.720   |
| No                                | 80.0               | 35              | 0.80 (0.55-0.93)            |         |
| Floor Type (TVC)                  |                    |                 |                             |         |
| Solid                             | 78.9               | 123             | 0.80 (0.69-0.88)            | 0.292   |
| Permeable                         | 71.4               | 97              | 0.72 (0.58-0.83)            |         |
| Drain score (TVC)                 |                    |                 |                             |         |
| ≤2                                | 80.1               | 166             | 0.80 (0.70-0.87)            | 0.155   |
| >2                                | 68.5               | 54              | 0.66 (0.45-0.82)            |         |
| Clean <6 weeks (TVC)              |                    |                 |                             |         |
| Yes                               | 77.0               | 122             | 0.77 (0.65-0.85)            | 0.591   |
| No                                | 70.1               | 67              | 0.72 (0.55-0.84)            |         |
| Clean <3 weeks (TVC)              |                    |                 |                             |         |
| Yes                               | 77.4               | 53              | 0.78 (0.59-0.89)            | 0.660   |
| No                                | 73.5               | 136             | 0.74 (0.62-0.82)            |         |
| Wash and Disinfect <6 weeks (TVC) |                    |                 |                             |         |
| Yes                               | 74.3               | 74              | 0.73 (0.56-0.85)            | 0.716   |
| No                                | 75.2               | 133             | 0.76 (0.64-0.85)            |         |
| Wash and Disinfect <3 weeks (TVC) |                    |                 |                             |         |
| Yes                               | 76.0               | 25              | 0.77 (0.50-0.92)            | 0.859   |
| No                                | 74.7               | 182             | 0.75 (0.65-0.83)            |         |
| Wash <6 weeks (TVC)               |                    |                 |                             |         |
| Yes                               | 74.4               | 43              | 0.74 (0.52-0.88)            | 0.917   |
| No                                | 74.7               | 146             | 0.75 (0.64-0.83)            |         |
| Wash <3 weeks (TVC)               |                    |                 |                             |         |

|                                      |       |     |                  |       |
|--------------------------------------|-------|-----|------------------|-------|
| Yes                                  | 84.7  | 13  | 0.83 (0.47-0.97) | 0.538 |
| No                                   | 73.9  | 176 | 0.74 (0.64-0.82) |       |
| Wash and Disinfect (TVC)             |       |     |                  |       |
| Yes                                  | 73.3  | 75  | 0.73 (0.57-0.85) | 0.744 |
| No                                   | 75.8  | 132 | 0.76 (0.64-0.85) |       |
| SD >2 m <sup>2</sup> (TVC)           |       |     |                  |       |
| Yes                                  | 73.3  | 105 | 0.74 (0.61-0.84) | 0.497 |
| No                                   | 80.5  | 87  | 0.79 (0.66-0.85) |       |
| Cleanease score (TVC)                |       |     |                  |       |
| ≤2                                   | 74.7  | 162 | 0.75 (0.63-0.83) | 0.468 |
| >2                                   | 81.0  | 81  | 0.81 (0.63-0.92) |       |
| Disinfectant used (TCC)              |       |     |                  |       |
| Yes                                  | 90.6  | 191 | 0.90 (0.81-0.95) | 0.708 |
| No                                   | 89.2  | 37  | 0.87 (0.56-0.97) |       |
| Clean <6 weeks (TCC)                 |       |     |                  |       |
| Yes                                  | 92.1  | 127 | 0.91 (0.81-0.96) | 0.313 |
| No                                   | 84.3  | 70  | 0.84 (0.64-0.94) |       |
| Clean <3 weeks (TCC)                 |       |     |                  |       |
| Yes                                  | 89.5  | 57  | 0.88 (0.68-0.96) | 0.963 |
| No                                   | 89.3  | 140 | 0.89 (0.77-0.95) |       |
| Wash and Disinfect <6 weeks (TCC)    |       |     |                  |       |
| Yes                                  | 92.0  | 79  | 0.91 (0.76-0.97) | 0.676 |
| No                                   | 88.3  | 136 | 0.88 (0.86-0.95) |       |
| Wash and Disinfect <3 weeks (TCC)    |       |     |                  |       |
| Yes                                  | 93.1  | 29  | 0.91 (0.61-0.98) | 0.862 |
| No                                   | 89.2  | 186 | 0.89 (0.80-0.95) |       |
| Wash <6 weeks (TCC)                  |       |     |                  |       |
| Yes                                  | 91.7  | 48  | 0.91 (0.70-0.98) | 0.654 |
| No                                   | 88.6  | 149 | 0.88 (0.76-0.94) |       |
| Wash <3 weeks (TCC)                  |       |     |                  |       |
| Yes                                  | 100.0 | 17  | 1.00             | 0.978 |
| No                                   | 88.3  | 180 | 0.88 (0.78-0.93) |       |
| Wash and Disinfect (TCC)             |       |     |                  |       |
| Yes                                  | 86.2  | 80  | 0.87 (0.69-0.95) | 0.552 |
| No                                   | 91.9  | 135 | 0.91 (0.80-0.96) |       |
| Cleanease score (TCC)                |       |     |                  |       |
| ≤2                                   | 92.3  | 169 | 0.90 (0.79-0.95) | 0.892 |
| >2                                   | 84.7  | 59  | 0.91 (0.71-0.97) |       |
| Pen type ( <i>E. coli</i> )          |       |     |                  |       |
| Single                               | 97.8  | 93  | 0.96 (0.88-0.99) | 0.682 |
| Group                                | 95.7  | 136 | 0.97 (0.92-0.99) |       |
| Disinfectant used ( <i>E. coli</i> ) |       |     |                  |       |
| Yes                                  | 97.4  | 191 | 0.97 (0.93-0.99) | 0.520 |
| No                                   | 94.7  | 38  | 0.95 (0.73-0.99) |       |
| Floor Type ( <i>E. coli</i> )        |       |     |                  |       |
| Solid                                | 98.4  | 128 | 0.99 (0.93-1.00) | 0.146 |
| Permeable                            | 95.0  | 101 | 0.94 (0.82-0.98) |       |
| Drain score ( <i>E. coli</i> )       |       |     |                  |       |
| ≤2                                   | 97.1  | 173 | 0.97 (0.92-0.99) | 0.841 |

|                                                |        |     |                  |       |
|------------------------------------------------|--------|-----|------------------|-------|
| >2                                             | 96.4   | 56  | 0.96 (0.82-0.99) |       |
| Clean <6 weeks ( <i>E. coli</i> )              |        |     |                  |       |
| Yes                                            | 97.6   | 127 | 0.98 (0.91-0.99) | 0.606 |
| No                                             | 95.7   | 70  | 0.96 (0.84-0.99) |       |
| Clean <3 weeks ( <i>E. coli</i> )              |        |     |                  |       |
| Yes                                            | 94.8   | 57  | 0.95 (0.79-0.99) | 0.402 |
| No                                             | 97.9   | 140 | 0.98 (0.92-0.99) |       |
| Wash and Disinfect <6 weeks ( <i>E. coli</i> ) |        |     |                  |       |
| Yes                                            | 100    | 79  | 1.00             | 0.987 |
| No                                             | 94.9   | 127 | 0.95 (0.88-0.98) |       |
| Wash and Disinfect <3 weeks ( <i>E. coli</i> ) |        |     |                  |       |
| Yes                                            | 100    | 79  | 1.00             | 0.991 |
| No                                             | 94.9   | 137 | 0.96 (0.91-0.99) |       |
| Wash <6 weeks ( <i>E. coli</i> )               |        |     |                  |       |
| Yes                                            | 100    | 48  | 1.00             | 0.997 |
| No                                             | 96     | 149 | 0.96 (0.90-0.99) |       |
| Wash <3 weeks ( <i>E. coli</i> )               |        |     |                  |       |
| Yes                                            | 100    | 48  | 1.00             | 0.997 |
| No                                             | 96.0   | 149 | 0.97 (0.92-0.99) |       |
| Wash and Disinfect ( <i>E. coli</i> )          |        |     |                  |       |
| Yes                                            | 96.2   | 80  | 0.96 (0.86-0.99) | 0.814 |
| No                                             | 97.1   | 136 | 0.97 (0.91-0.99) |       |
| SD >2 m <sup>2</sup> ( <i>E. coli</i> )        |        |     |                  |       |
| Yes                                            | 98.2   | 109 | 0.97 (0.90-0.99) | 0.723 |
| No                                             | 0.95.6 | 91  | 0.96 (0.86-0.99) |       |
| Cleanease score ( <i>E. coli</i> )             |        |     |                  |       |
| ≤2                                             | 98.2   | 169 | 0.97 (0.90-0.99) | 0.534 |
| >2                                             | 93.3   | 60  | 0.98 (0.87-1.00) |       |

TVC = Total Viable Count TCC = Total Coliform Count

Supplementary Table S3. Risk factors for feeding equipment that were not associated with the likelihood of meeting hygiene indicator targets

| Variable<br>(Hygiene Indicator)              | % within<br>target | Total<br>number | Probability*<br>(LCI-UCI**) | p-value |
|----------------------------------------------|--------------------|-----------------|-----------------------------|---------|
| Milk Feeders                                 |                    |                 |                             |         |
| Feeder Type (TVC)                            |                    |                 |                             |         |
| Single                                       | 31.3               | 118             | 0.33 (0.23-0.46)            | 0.670   |
| Group                                        | 33.3               | 63              | 0.30 (0.17-0.46)            |         |
| Clean Area (TVC)                             |                    |                 |                             |         |
| Yes                                          | 36.7               | 60              | 0.38 (0.22-0.58)            | 0.394   |
| No                                           | 29.7               | 121             | 0.29 (0.18-0.42)            |         |
| Dry Area (TVC)                               |                    |                 |                             |         |
| Yes                                          | 40.6               | 32              | 0.42 (0.20-0.67)            | 0.389   |
| No                                           | 30.2               | 149             | 0.30 (0.20-0.42)            |         |
| Cleaned with hot water and<br>chemical (TVC) |                    |                 |                             |         |
| Yes                                          | 28.0               | 50              | 0.28 (0.13-0.50)            | 0.678   |
| No                                           | 33.1               | 127             | 0.33 (0.22-0.46)            |         |
| Cleaned with hot water (TVC)                 |                    |                 |                             |         |

|                                               |        |     |                  |       |
|-----------------------------------------------|--------|-----|------------------|-------|
| Yes                                           | 28.6   | 91  | 0.29 (0.17-0.45) | 0.641 |
| No                                            | 0.34.9 | 86  | 0.34 (0.21-0.51) |       |
| Cleaned with chemical (TVC)                   |        |     |                  |       |
| Yes                                           | 25.0   | 76  | 0.26 (0.14-0.43) | 0.333 |
| No                                            | 36.6   | 101 | 0.27 (0.17-0.40) |       |
| Cleaned with cold water (TVC)                 |        |     |                  |       |
| Yes                                           | 43.9   | 57  | 0.42 (0.24-0.63) | 0.184 |
| No                                            | 25.8   | 120 | 0.27 (0.17-0.40) |       |
| Cleaned at least daily (TVC)                  |        |     |                  |       |
| Yes                                           | 37.7   | 77  | 0.37 (0.23-0.53) | 0.367 |
| No                                            | 27.7   | 94  | 0.27 (0.16-0.42) |       |
| Cleaned with hot water after every feed (TVC) |        |     |                  |       |
| Yes                                           | 53.3   | 30  | 0.50 (0.25-0.75) | 0.115 |
| No                                            | 32.1   | 137 | 0.27 (0.18-0.39) |       |
| Cleaned with hot water at least daily (TVC)   |        |     |                  |       |
| Yes                                           | 43.2   | 37  | 0.41 (0.21-0.65) | 0.346 |
| No                                            | 28.5   | 130 | 0.29 (0.18-0.41) |       |
| Cleaned with chemical at least daily (TVC)    |        |     |                  |       |
| Yes                                           | 42.1   | 19  | 0.37 (0.12-0.72) | 0.714 |
| No                                            | 30.4   | 148 | 0.31 (0.21-0.43) |       |
| High TVC in mixing utensils (TVC)             |        |     |                  |       |
| Yes                                           | 41.7   | 57  | 0.40 (0.22-0.61) | 0.456 |
| No                                            | 29.4   | 85  | 0.31 (0.18-0.47) |       |
| Feeder Type (TCC)                             |        |     |                  |       |
| Single                                        | 51.7   | 120 | 0.52 (0.41-0.63) | 0.424 |
| Group                                         | 58.7   | 63  | 0.59 (0.45-0.72) |       |
| Clean Area (TCC)                              |        |     |                  |       |
| Yes                                           | 55.0   | 60  | 0.56 (0.41-0.71) | 0.759 |
| No                                            | 54.5   | 123 | 0.53 (0.42-0.64) |       |
| Dry Area (TCC)                                |        |     |                  |       |
| Yes                                           | 53.1   | 32  | 0.55 (0.34-0.74) | 0.989 |
| No                                            | 55.0   | 151 | 0.54 (0.44-0.64) |       |
| Cleaned with hot water and chemical (TCC)     |        |     |                  |       |
| Yes                                           | 48.1   | 52  | 0.49 (0.32-0.66) | 0.507 |
| No                                            | 56.7   | 127 | 0.56 (0.56-0.66) |       |
| Cleaned with hot water (TCC)                  |        |     |                  |       |
| Yes                                           | 48.4   | 93  | 0.49 (0.36-0.62) | 0.260 |
| No                                            | 60.5   | 86  | 0.60 (0.46-0.72) |       |
| Cleaned with chemical (TCC)                   |        |     |                  |       |
| Yes                                           | 56.4   | 78  | 0.58 (0.43-0.71) | 0.504 |
| No                                            | 52.5   | 101 | 0.51 (0.39-0.63) |       |
| Cleaned with cold water (TCC)                 |        |     |                  |       |
| Yes                                           | 54.4   | 57  | 0.52 (0.36-0.68) | 0.797 |
| No                                            | 54.1   | 122 | 0.55 (0.44-0.66) |       |
| Cleaned at least daily (TCC)                  |        |     |                  |       |
| Yes                                           | 57.1   | 77  | 0.56 (0.42-0.69) | 0.706 |

|                                                            |      |     |                  |       |
|------------------------------------------------------------|------|-----|------------------|-------|
| No                                                         | 52.1 | 96  | 0.52 (0.39-0.65) |       |
| Cleaned with hot water after every feed (TCC)              |      |     |                  |       |
| Yes                                                        | 63.3 | 30  | 0.62 (0.39-0.80) | 0.446 |
| No                                                         | 51.8 | 139 | 0.52 (0.41-0.62) |       |
| Cleaned with hot water at least daily (TCC)                |      |     |                  |       |
| Yes                                                        | 56.8 | 37  | 0.55 (0.35-0.74) | 0.852 |
| No                                                         | 53.0 | 132 | 0.53 (0.42-0.64) |       |
| High TVC in mixing utensils (TCC)                          |      |     |                  |       |
| Yes                                                        | 53.4 | 73  | 0.54 (0.38-0.68) | 0.953 |
| No                                                         | 53.5 | 71  | 0.53 (0.38-0.68) |       |
| Feeder Type ( <i>E. coli</i> )                             |      |     |                  |       |
| Single                                                     | 92.5 | 120 | 0.93 (0.86-0.96) | 0.343 |
| Group                                                      | 88.9 | 63  | 0.88 (0.76-0.94) |       |
| Clean Area ( <i>E. coli</i> )                              |      |     |                  |       |
| Yes                                                        | 95.0 | 60  | 0.95 (0.85-0.98) | 0.232 |
| No                                                         | 89.4 | 123 | 0.89 (0.81-0.94) |       |
| Dry Area ( <i>E. coli</i> )                                |      |     |                  |       |
| Yes                                                        | 96.9 | 32  | 0.97 (0.80-1.00) | 0.251 |
| No                                                         | 90.1 | 151 | 0.90 (0.83-0.94) |       |
| Cleaned with hot water and chemical ( <i>E. coli</i> )     |      |     |                  |       |
| Yes                                                        | 90.4 | 52  | 0.90 (0.77-0.96) | 0.882 |
| No                                                         | 91.3 | 127 | 0.91 (0.84-0.95) |       |
| Cleaned with hot water ( <i>E. coli</i> )                  |      |     |                  |       |
| Yes                                                        | 90.3 | 93  | 0.90 (0.81-0.95) | 0.728 |
| No                                                         | 91.9 | 86  | 0.92 (0.83-0.93) |       |
| Cleaned with chemical ( <i>E. coli</i> )                   |      |     |                  |       |
| Yes                                                        | 92.3 | 78  | 0.92 (0.83-0.97) | 0.615 |
| No                                                         | 90.1 | 101 | 0.90 (0.81-0.95) |       |
| Cleaned with cold water ( <i>E. coli</i> )                 |      |     |                  |       |
| Yes                                                        | 89.5 | 57  | 0.89 (0.77-0.96) | 0.653 |
| No                                                         | 91.8 | 122 | 0.92 (0.84-0.96) |       |
| Cleaned after every feed ( <i>E. coli</i> )                |      |     |                  |       |
| Yes                                                        | 92.8 | 55  | 0.93 (0.81-0.97) | 0.702 |
| No                                                         | 90.7 | 118 | 0.91 (0.83-0.95) |       |
| Cleaned at least daily ( <i>E. coli</i> )                  |      |     |                  |       |
| Yes                                                        | 89.6 | 77  | 0.90 (0.79-0.95) | 0.556 |
| No                                                         | 92.7 | 96  | 0.93 (0.84-0.97) |       |
| Cleaned with hot water after every feed ( <i>E. coli</i> ) |      |     |                  |       |
| Yes                                                        | 93.4 | 30  | 0.93 (0.75-0.98) | 0.692 |
| No                                                         | 90.6 | 139 | 0.91 (0.84-0.95) |       |
| Cleaned with hot water at least daily ( <i>E. coli</i> )   |      |     |                  |       |
| Yes                                                        | 89.2 | 37  | 0.89 (0.71-0.96) | 0.621 |
| No                                                         | 91.7 | 132 | 0.92 (0.85-0.96) |       |
| Cleaned with chemical at least daily ( <i>E. coli</i> )    |      |     |                  |       |

|                                                |      |     |                  |       |
|------------------------------------------------|------|-----|------------------|-------|
| Yes                                            | 94.7 | 19  | 0.95 (0.68-0.99) | 0.602 |
| No                                             | 90.7 | 150 | 0.91 (0.84-0.95) |       |
| High TVC in mixing utensils ( <i>E. coli</i> ) |      |     |                  |       |
| Yes                                            | 89.0 | 73  | 0.89 (0.79-0.94) | 0.267 |
| No                                             | 94.4 | 71  | 0.94 (0.86-0.98) |       |
| High TCC in mixing utensils ( <i>E. coli</i> ) |      |     |                  |       |
| Yes                                            | 91.6 | 95  | 0.92 (0.84-0.96) | 0.977 |
| No                                             | 91.8 | 49  | 0.92 (0.80-0.97) |       |
| <hr/>                                          |      |     |                  |       |
| Teats                                          |      |     |                  |       |
| Pen Type (TVC)                                 |      |     |                  |       |
| Single                                         | 59.6 | 47  | 0.60 (0.44-0.74) | 0.796 |
| Group                                          | 62.3 | 61  | 0.48 (0.48-0.75) |       |
| Teat Type (TVC)                                |      |     |                  |       |
| Single                                         | 59.6 | 47  | 0.60 (0.43-0.74) | 0.965 |
| Group                                          | 61.5 | 26  | 0.62 (0.41-0.79) |       |
| AMF                                            | 62.9 | 35  | 0.63 (0.44-0.79) |       |
| Clean Area (TVC)                               |      |     |                  |       |
| Yes                                            | 65.1 | 43  | 0.65 (0.47-0.79) | 0.590 |
| No                                             | 58.5 | 65  | 0.59 (0.45-0.71) |       |
| Dry Area (TVC)                                 |      |     |                  |       |
| Yes                                            | 69.2 | 26  | 0.69 (0.46-0.85) | 0.419 |
| No                                             | 58.5 | 82  | 0.59 (0.46-0.70) |       |
| Cleaned with hot water and chemical (TVC)      |      |     |                  |       |
| Yes                                            | 64.7 | 34  | 0.64 (0.45-0.80) | 0.69  |
| No                                             | 59.5 | 74  | 0.60 (0.47-0.72) |       |
| Cleaned with hot water (TVC)                   |      |     |                  |       |
| Yes                                            | 61.7 | 47  | 0.61 (0.44-0.75) | 0.952 |
| No                                             | 63.9 | 61  | 0.61 (0.47-0.74) |       |
| Cleaned with chemical (TVC)                    |      |     |                  |       |
| Yes                                            | 60.0 | 45  | 0.59 (0.42-0.74) | 0.775 |
| No                                             | 61.9 | 63  | 0.62 (0.48-0.75) |       |
| Cleaned with cold water (TVC)                  |      |     |                  |       |
| Yes                                            | 67.9 | 28  | 0.68 (0.47-0.84) | 0.412 |
| No                                             | 58.7 | 80  | 0.59 (0.46-0.70) |       |
| Cleaned after every feed (TVC)                 |      |     |                  |       |
| Yes                                            | 62.1 | 29  | 0.61 (0.41-0.78) | 0.943 |
| No                                             | 60.8 | 79  | 0.61 (0.49-0.73) |       |
| Cleaned at least daily (TVC)                   |      |     |                  |       |
| Yes                                            | 56.9 | 51  | 0.57 (0.42-0.71) | 0.455 |
| No                                             | 64.9 | 57  | 0.65 (0.50-0.78) |       |
| Cleaned with hot water after every feed (TVC)  |      |     |                  |       |
| Yes                                            | 54.6 | 11  | 0.53 (0.24-0.80) | 0.599 |
| No                                             | 61.9 | 97  | 0.62 (0.51-0.72) |       |
| Cleaned with hot water at least daily (TVC)    |      |     |                  |       |
| Yes                                            | 50.0 | 22  | 0.50 (0.29-0.72) | 0.295 |
| No                                             | 64.0 | 86  | 0.64 (0.52-0.75) |       |

|                                               |      |    |                  |       |
|-----------------------------------------------|------|----|------------------|-------|
| Cleaned with chemical at least daily (TVC)    |      |    |                  |       |
| Yes                                           | 40.0 | 15 | 0.40 (0.18-0.68) | 0.131 |
| No                                            | 64.5 | 93 | 0.65 (0.53-0.75) |       |
| High TVC in mixing utensils (TVC)             |      |    |                  |       |
| Yes                                           | 78.6 | 28 | 0.65 (0.38-0.85) | 0.417 |
| No                                            | 39.5 | 43 | 0.52 (0.37-0.67) |       |
| High TCC in mixing utensils (TVC)             |      |    |                  |       |
| Yes                                           | 58.9 | 56 | 0.59 (0.44-0.73) | 0.288 |
| No                                            | 40.0 | 15 | 0.42 (0.18-0.69) |       |
| Pen Type (TCC)                                |      |    |                  |       |
| Single                                        | 62.5 | 48 | 0.65 (0.47-0.80) | 0.338 |
| Group                                         | 79   | 62 | 0.77 (0.62-0.88) |       |
| Teat Type (TCC)                               |      |    |                  |       |
| Single                                        | 62.5 | 48 | 0.65 (0.47-0.80) | 0.500 |
| Group                                         | 80.8 | 26 | 0.79 (0.55-0.92) |       |
| AMF                                           | 77.8 | 36 | 0.76 (0.55-0.90) |       |
| Clean Area (TCC)                              |      |    |                  |       |
| Yes                                           | 71.1 | 45 | 0.72 (0.51-0.87) | 0.923 |
| No                                            | 72.3 | 65 | 0.71 (0.55-0.84) |       |
| Dry Area (TCC)                                |      |    |                  |       |
| Yes                                           | 84.6 | 26 | 0.85 (0.59-0.95) | 0.214 |
| No                                            | 67.9 | 84 | 0.68 (0.54-0.80) |       |
| Cleaned with hot water (TCC)                  |      |    |                  |       |
| Yes                                           | 77.1 | 48 | 0.75 (0.56-0.88) | 0.597 |
| No                                            | 67.7 | 62 | 0.69 (0.52-0.82) |       |
| Cleaned with chemical (TCC)                   |      |    |                  |       |
| Yes                                           | 82.3 | 45 | 0.81 (0.62-0.91) | 0.199 |
| No                                            | 64.6 | 65 | 0.66 (0.50-0.79) |       |
| Cleaned with cold water (TCC)                 |      |    |                  |       |
| Yes                                           | 69   | 29 | 0.71 (0.48-0.87) | 0.959 |
| No                                            | 72.8 | 81 | 0.72 (0.57-0.83) |       |
| Cleaned after every feed (TCC)                |      |    |                  |       |
| Yes                                           | 70   | 30 | 0.69 (0.46-0.85) | 0.718 |
| No                                            | 72.5 | 80 | 0.73 (0.58-0.84) |       |
| Cleaned at least daily (TCC)                  |      |    |                  |       |
| Yes                                           | 67.9 | 53 | 0.68 (0.50-0.82) | 0.518 |
| No                                            | 75.4 | 57 | 0.75 (0.58-0.87) |       |
| Cleaned with hot water after every feed (TCC) |      |    |                  |       |
| Yes                                           | 50   | 12 | 0.56 (0.24-0.83) | 0.280 |
| No                                            | 74.5 | 98 | 0.74 (0.61-0.84) |       |
| Cleaned with hot water at least daily (TCC)   |      |    |                  |       |
| Yes                                           | 60.9 | 23 | 0.62 (0.35-0.83) | 0.337 |
| No                                            | 74.7 | 87 | 0.75 (0.61-0.85) |       |
| Cleaned with chemical at least daily (TCC)    |      |    |                  |       |
| Yes                                           | 83.3 | 15 | 0.77 (0.42-0.94) | 0.687 |



|                                                            |      |    |                  |       |
|------------------------------------------------------------|------|----|------------------|-------|
| No                                                         | 70.5 | 95 | 0.71 (0.57-0.82) |       |
| High TVC in mixing utensils (TCC)                          |      |    |                  |       |
| Yes                                                        | 70   | 30 | 0.73 (0.47-0.89) | 0.745 |
| No                                                         | 67.4 | 43 | 0.68 (0.46-0.84) |       |
| High TCC in mixing utensils (TCC)                          |      |    |                  |       |
| Yes                                                        | 75.9 | 58 | 0.77 (0.59-0.89) | 0.12  |
| No                                                         | 40   | 15 | 0.46 (0.17-0.78) |       |
| Pen Type ( <i>E. coli</i> )                                |      |    |                  |       |
| Single                                                     | 83.3 | 48 | 0.83 (0.64-0.94) | 0.821 |
| Group                                                      | 85.5 | 62 | 0.85 (0.69-0.94) |       |
| Teat Type ( <i>E. coli</i> )                               |      |    |                  |       |
| Single                                                     | 83.3 | 48 | 0.84 (0.64-0.94) | 0.933 |
| Group                                                      | 84.6 | 26 | 0.83 (0.56-0.95) |       |
| AMF                                                        | 86.1 | 36 | 0.87 (0.64-0.96) |       |
| Clean Area ( <i>E. coli</i> )                              |      |    |                  |       |
| Yes                                                        | 84.4 | 45 | 0.87 (0.64-0.96) | 0.707 |
| No                                                         | 84.6 | 65 | 0.83 (0.65-0.93) |       |
| Dry Area ( <i>E. coli</i> )                                |      |    |                  |       |
| Yes                                                        | 96.2 | 26 | 0.96 (0.71-1.00) | 0.161 |
| No                                                         | 81   | 84 | 0.81 (0.66-0.91) |       |
| Cleaned with hot water and chemical ( <i>E. coli</i> )     |      |    |                  |       |
| Yes                                                        | 91.2 | 34 | 0.91 (0.68-0.98) | 0.41  |
| No                                                         | 81.6 | 76 | 0.82 (0.67-0.92) |       |
| Cleaned with hot water ( <i>E. coli</i> )                  |      |    |                  |       |
| Yes                                                        | 81.2 | 48 | 0.83 (0.59-0.93) | 0.562 |
| No                                                         | 87.1 | 62 | 0.87 (0.71-0.95) |       |
| Cleaned with chemical ( <i>E. coli</i> )                   |      |    |                  |       |
| Yes                                                        | 88.9 | 45 | 0.89 (0.69-0.96) | 0.505 |
| No                                                         | 81.5 | 65 | 0.82 (0.65-0.92) |       |
| Cleaned with cold water ( <i>E. coli</i> )                 |      |    |                  |       |
| Yes                                                        | 79.3 | 29 | 0.81 (0.54-0.94) | 0.593 |
| No                                                         | 86.4 | 81 | 0.86 (0.72-0.94) |       |
| Cleaned after every feed ( <i>E. coli</i> )                |      |    |                  |       |
| Yes                                                        | 80   | 30 | 0.81 (0.56-0.93) | 0.575 |
| No                                                         | 86.2 | 80 | 0.86 (0.72-0.94) |       |
| Cleaned at least daily ( <i>E. coli</i> )                  |      |    |                  |       |
| Yes                                                        | 77.4 | 53 | 0.78 (0.59-0.90) | 0.169 |
| No                                                         | 81.5 | 57 | 0.91 (0.76-0.97) |       |
| Cleaned with hot water after every feed ( <i>E. coli</i> ) |      |    |                  |       |
| Yes                                                        | 58.3 | 12 | 0.71 (0.32-0.93) | 0.266 |
| No                                                         | 87.8 | 98 | 0.87 (0.75-0.94) |       |
| Cleaned with hot water at least daily ( <i>E. coli</i> )   |      |    |                  |       |
| Yes                                                        | 65.2 | 23 | 0.71 (0.40-0.90) | 0.125 |
| No                                                         | 89.7 | 87 | 0.77 (0.77-0.95) |       |
| Cleaned with chemical at least daily ( <i>E. coli</i> )    |      |    |                  |       |

|                                                |                                        |      |     |                  |       |
|------------------------------------------------|----------------------------------------|------|-----|------------------|-------|
| High TVC in mixing utensils ( <i>E. coli</i> ) | Yes                                    | 86.7 | 15  | 0.87 (0.44-0.98) | 0.877 |
|                                                | No                                     | 84.2 | 95  | 0.84 (0.70-0.92) |       |
|                                                | Yes                                    | 76.7 | 30  | 0.82 (0.51-0.95) |       |
|                                                | No                                     | 88.4 | 43  | 0.87 (0.64-0.96) |       |
| High TCC in mixing utensils ( <i>E. coli</i> ) | Yes                                    | 82.8 | 58  | 0.85 (0.65-0.95) | 0.996 |
|                                                | No                                     | 86.7 | 15  | 0.85 (0.40-0.98) |       |
|                                                | Mixing Utensils                        |      |     |                  |       |
|                                                | Mixing Utensil Type (TVC)              |      |     |                  |       |
|                                                | Mix container                          | 60.5 | 76  | 0.60 (0.47-0.73) | 0.664 |
|                                                | Jug                                    | 55.6 | 27  | 0.54 (0.33-0.74) |       |
|                                                | Whisk                                  | 50   | 28  | 0.50 (0.30-0.71) |       |
|                                                | Clean Area (TVC)                       |      |     |                  |       |
|                                                | Yes                                    | 56.9 | 51  | 0.58 (0.40-0.74) | 0.933 |
|                                                | No                                     | 57.5 | 80  | 0.57 (0.42-0.70) |       |
|                                                | Dry Area (TVC)                         |      |     |                  |       |
|                                                | Yes                                    | 50   | 32  | 0.52 (0.30-0.73) |       |
|                                                | No                                     | 59.6 | 99  | 0.59 (0.46-0.71) | 0.625 |
|                                                | Mixing Utensil Type (TCC)              |      |     |                  |       |
|                                                | Mix container                          | 84.2 | 76  | 0.82 (0.69-0.90) |       |
|                                                | Jug                                    | 79.3 | 29  | 0.79 (0.57-0.92) |       |
|                                                | Whisk                                  | 75   | 28  | 0.80 (0.57-0.92) | 0.956 |
|                                                | Clean Area (TCC)                       |      |     |                  |       |
|                                                | Yes                                    | 84.6 | 52  | 0.85 (0.67-0.94) |       |
|                                                | No                                     | 79   | 81  | 0.78 (0.62-0.88) |       |
|                                                | Dry Area (TCC)                         |      |     |                  | 0.489 |
|                                                | Yes                                    | 78.8 | 33  | 0.81 (0.55-0.93) |       |
|                                                | No                                     | 82   | 100 | 0.81 (0.68-0.89) |       |
|                                                | Mixing Utensil Type ( <i>E. coli</i> ) |      |     |                  |       |
|                                                | Mix container                          | 98.7 | 76  | 0.98 (0.87-1.00) | 0.466 |
|                                                | Jug                                    | 96.6 | 29  | 0.97 (0.69-1.00) |       |
|                                                | Whisk                                  | 100  | 28  | 1.00 (0.76-1.00) |       |
|                                                | Clean Area ( <i>E. coli</i> )          |      |     |                  |       |
|                                                | Yes                                    | 100  | 52  | 1.00 (0.00-1.00) | 0.603 |
|                                                | No                                     | 97.5 | 81  | 0.98 (0.86-1.00) |       |
|                                                | Dry Area ( <i>E. coli</i> )            |      |     |                  |       |
|                                                | Yes                                    | 100  | 33  | 1.00 (0.00-1.00) |       |
|                                                | No                                     | 98   | 100 | 0.98 (0.89-1.00) | 0.709 |

TVC = Total Viable Count TCC = Total Coliform Count
